# Supplementary material for: Identification of a centrosome-related prognostic signature for breast cancer
Source: Front Oncol. 2023 Mar 22;13:1138049. doi: 10.3389/fonc.2023.1138049 (PMC10073657; doi:10.3389/fonc.2023.1138049)
Supplement: Supplementary file 4 [file Table_1.xlsx]

## Sheet: Sheet1
SAC3D1	SAC3 domain containing 1
SFI1	SFI1 centrin binding protein
PIK3R2	phosphoinositide-3-kinase regulatory subunit 2
CHEK1	checkpoint kinase 1
IKBKB	inhibitor of nuclear factor kappa B kinase subunit beta
AZIN1	antizyme inhibitor 1
ARHGEF10	Rho guanine nucleotide exchange factor 10
CEP290	centrosomal protein 290
CHUK	component of inhibitor of nuclear factor kappa B kinase complex
ARPC1B	actin related protein 2/3 complex subunit 1B
CETN3	centrin 3
FANCA	FA complementation group A
SOCS1	suppressor of cytokine signaling 1
OGG1	8-oxoguanine DNA glycosylase
PSMD3	proteasome 26S subunit, non-ATPase 3
CCP110	centriolar coiled-coil protein 110
WDR62	WD repeat domain 62
LAMTOR5	late endosomal/lysosomal adaptor, MAPK and MTOR activator 5
RGS14	regulator of G protein signaling 14
DCX	doublecortin
SSNA1	SS nuclear autoantigen 1
PRKN	parkin RBR E3 ubiquitin protein ligase
CEP104	centrosomal protein 104
KDM1A	lysine demethylase 1A
YPEL1	yippee like 1
CTNND1	catenin delta 1
CDC14B	cell division cycle 14B
PPP1R11	protein phosphatase 1 regulatory inhibitor subunit 11
ROCK2	Rho associated coiled-coil containing protein kinase 2
HMMR	hyaluronan mediated motility receptor
MACROH2A1	macroH2A.1 histone
KATNA1	katanin catalytic subunit A1
GMNN	geminin DNA replication inhibitor
USP2	ubiquitin specific peptidase 2
OFD1	OFD1 centriole and centriolar satellite protein
NEURL1	neuralized E3 ubiquitin protein ligase 1
CEP152	centrosomal protein 152
EPM2A	EPM2A glucan phosphatase, laforin
TACC2	transforming acidic coiled-coil containing protein 2
PCNT	pericentrin
CEP43	centrosomal protein 43
HERC2	HECT and RLD domain containing E3 ubiquitin protein ligase 2
FTCD	formimidoyltransferase cyclodeaminase
MBD3	methyl-CpG binding domain protein 3
PTTG1	PTTG1 regulator of sister chromatid separation, securin
CCNE2	cyclin E2
PNP	purine nucleoside phosphorylase
S100B	S100 calcium binding protein B
NTRK1	neurotrophic receptor tyrosine kinase 1
TP53	tumor protein p53
APP	amyloid beta precursor protein
PRKCB	protein kinase C beta
LCK	LCK proto-oncogene, Src family tyrosine kinase
FYN	FYN proto-oncogene, Src family tyrosine kinase
RB1	RB transcriptional corepressor 1
NPM1	nucleophosmin 1
SP1	Sp1 transcription factor
PKHD1	PKHD1 ciliary IPT domain containing fibrocystin/polyductin
ENO2	enolase 2
MAPT	microtubule associated protein tau
MAP2	microtubule associated protein 2
HSPA8	heat shock protein family A (Hsp70) member 8
PIM1	Pim-1 proto-oncogene, serine/threonine kinase
FGFR1	fibroblast growth factor receptor 1
PSKH1	protein serine kinase H1
PRKAR2A	protein kinase cAMP-dependent type II regulatory subunit alpha
VCL	vinculin
XRCC1	X-ray repair cross complementing 1
PLCG1	phospholipase C gamma 1
CSNK2A2	casein kinase 2 alpha 2
CCNA2	cyclin A2
CDK11B	cyclin dependent kinase 11B
COMT	catechol-O-methyltransferase
IGFBP4	insulin like growth factor binding protein 4
CDK2	cyclin dependent kinase 2
TPP2	tripeptidyl peptidase 2
PML	PML nuclear body scaffold
CRABP1	cellular retinoic acid binding protein 1
MARCKS	myristoylated alanine rich protein kinase C substrate
CDC25B	cell division cycle 25B
CDC25C	cell division cycle 25C
PRKAR2B	protein kinase cAMP-dependent type II regulatory subunit beta
ARRB2	arrestin beta 2
MCM5	minichromosome maintenance complex component 5
GRK5	G protein-coupled receptor kinase 5
ARL2	ADP ribosylation factor like GTPase 2
HSPA9	heat shock protein family A (Hsp70) member 9
CDKN1A	cyclin dependent kinase inhibitor 1A
STAT3	signal transducer and activator of transcription 3
CCNF	cyclin F
ID1	inhibitor of DNA binding 1, HLH protein
CETN2	centrin 2
ACTR1B	actin related protein 1B
STAT5A	signal transducer and activator of transcription 5A
PIK3CA	phosphatidylinositol-4,5-bisphosphate 3-kinase catalytic subunit alpha
CASP3	caspase 3
HTT	huntingtin
SYK	spleen associated tyrosine kinase
RANBP1	RAN binding protein 1
MAPK8	mitogen-activated protein kinase 8
MAP1B	microtubule associated protein 1B
CSNK1D	casein kinase 1 delta
PXN	paxillin
CSNK1E	casein kinase 1 epsilon
TSC2	TSC complex subunit 2
GSK3A	glycogen synthase kinase 3 alpha
LIG3	DNA ligase 3
MMP14	matrix metallopeptidase 14
PGD	phosphogluconate dehydrogenase
MAPK10	mitogen-activated protein kinase 10
SLC16A1	solute carrier family 16 member 1
HAP1	huntingtin associated protein 1
HSPA2	heat shock protein family A (Hsp70) member 2
PSMD4	proteasome 26S subunit ubiquitin receptor, non-ATPase 4
CDH13	cadherin 13
HUNK	hormonally up-regulated Neu-associated kinase
PPP4C	protein phosphatase 4 catalytic subunit
RAB8A	RAB8A, member RAS oncogene family
ACTR1A	actin related protein 1A
COPS2	COP9 signalosome subunit 2
YPEL3	yippee like 3
STX1B	syntaxin 1B
LMO4	LIM domain only 4
YWHAG	tyrosine 3-monooxygenase/tryptophan 5-monooxygenase activation protein gamma
PSMC5	proteasome 26S subunit, ATPase 5
YWHAE	tyrosine 3-monooxygenase/tryptophan 5-monooxygenase activation protein epsilon
YPEL5	yippee like 5
RAN	RAN, member RAS oncogene family
RPL41	ribosomal protein L41
UBA52	ubiquitin A-52 residue ribosomal protein fusion product 1
GRB2	growth factor receptor bound protein 2
SKP1	S-phase kinase associated protein 1
CSNK2A1	casein kinase 2 alpha 1
CCNA1	cyclin A1
MAP1A	microtubule associated protein 1A
HSF1	heat shock transcription factor 1
MDM2	MDM2 proto-oncogene
EWSR1	EWS RNA binding protein 1
PRKCE	protein kinase C epsilon
PRKCQ	protein kinase C theta
UBE3A	ubiquitin protein ligase E3A
PTK2	protein tyrosine kinase 2
PSME1	proteasome activator subunit 1
PPARA	peroxisome proliferator activated receptor alpha
DHX9	DExH-box helicase 9
VAC14	VAC14 component of PIKFYVE complex
CETN1	centrin 1
TROAP	trophinin associated protein
GPS1	G protein pathway suppressor 1
IFT88	intraflagellar transport 88
IK	IK cytokine
PAK1	p21 (RAC1) activated kinase 1
PAK2	p21 (RAC1) activated kinase 2
PSMD2	proteasome 26S subunit ubiquitin receptor, non-ATPase 2
CTBP1	C-terminal binding protein 1
ORC1	origin recognition complex subunit 1
ILK	integrin linked kinase
GOLGA4	golgin A4
PIN1	peptidylprolyl cis/trans isomerase, NIMA-interacting 1
EIF4EBP1	eukaryotic translation initiation factor 4E binding protein 1
RUNX3	RUNX family transcription factor 3
PDE7A	phosphodiesterase 7A
WRN	WRN RecQ like helicase
CTTN	cortactin
PTK2B	protein tyrosine kinase 2 beta
NEDD9	neural precursor cell expressed, developmentally down-regulated 9
ESPL1	extra spindle pole bodies like 1, separase
KPNB1	karyopherin subunit beta 1
PCLAF	PCNA clamp associated factor
IQCB1	IQ motif containing B1
PCM1	pericentriolar material 1
STK38	serine/threonine kinase 38
STIL	STIL centriolar assembly protein
DIXDC1	DIX domain containing 1
TRIP10	thyroid hormone receptor interactor 10
SMAD1	SMAD family member 1
TBCC	tubulin folding cofactor C
CCDC85B	coiled-coil domain containing 85B
MAP3K11	mitogen-activated protein kinase kinase kinase 11
CCNG2	cyclin G2
CDKN3	cyclin dependent kinase inhibitor 3
GEN1	GEN1 Holliday junction 5' flap endonuclease
FAM110C	family with sequence similarity 110 member C
KIAA0753	KIAA0753
KIZ	kizuna centrosomal protein
FAM161A	FAM161 centrosomal protein A
CCDC88A	coiled-coil domain containing 88A
MAP9	microtubule associated protein 9
ODF2	outer dense fiber of sperm tails 2
RILPL1	Rab interacting lysosomal protein like 1
FIGN	fidgetin, microtubule severing factor
PCID2	PCI domain containing 2
CEP170	centrosomal protein 170
CEP85L	centrosomal protein 85 like
DCAF12	DDB1 and CUL4 associated factor 12
CEP162	centrosomal protein 162
IFFO2	intermediate filament family orphan 2
CROCC	ciliary rootlet coiled-coil, rootletin
CEP350	centrosomal protein 350
PDE4DIP	phosphodiesterase 4D interacting protein
ECPAS	Ecm29 proteasome adaptor and scaffold
CEP135	centrosomal protein 135
MAP1S	microtubule associated protein 1S
RAP1GAP2	RAP1 GTPase activating protein 2
CCSAP	centriole, cilia and spindle associated protein
RINT1	RAD50 interactor 1
BLOC1S2	biogenesis of lysosomal organelles complex 1 subunit 2
SASS6	SAS-6 centriolar assembly protein
NHLRC1	NHL repeat containing E3 ubiquitin protein ligase 1
ZNF365	zinc finger protein 365
SPATC1	spermatogenesis and centriole associated 1
CEP68	centrosomal protein 68
COPS6	COP9 signalosome subunit 6
MOB1B	MOB kinase activator 1B
CNTRL	centriolin
NEK8	NIMA related kinase 8
SDCCAG8	SHH signaling and ciliogenesis regulator SDCCAG8
LCA5	lebercilin LCA5
PARG	poly(ADP-ribose) glycohydrolase
CEP57	centrosomal protein 57
MIB1	MIB E3 ubiquitin protein ligase 1
BBS7	Bardet-Biedl syndrome 7
TRIM22	tripartite motif containing 22
SPART	spartin
SPICE1	spindle and centriole associated protein 1
CNTROB	centrobin, centriole duplication and spindle assembly protein
AHI1	Abelson helper integration site 1
BBS5	Bardet-Biedl syndrome 5
PAF1	PAF1 homolog, Paf1/RNA polymerase II complex component
CEP112	centrosomal protein 112
POC5	POC5 centriolar protein
POC1A	POC1 centriolar protein A
NAXE	NAD(P)HX epimerase
MCPH1	microcephalin 1
BBS1	Bardet-Biedl syndrome 1
CEP70	centrosomal protein 70
NEDD1	NEDD1 gamma-tubulin ring complex targeting factor
CTCFL	CCCTC-binding factor like
TTC8	tetratricopeptide repeat domain 8
CEP76	centrosomal protein 76
CCDC110	coiled-coil domain containing 110
POC1B	POC1 centriolar protein B
FAM110B	family with sequence similarity 110 member B
ALMS1	ALMS1 centrosome and basal body associated protein
CCHCR1	coiled-coil alpha-helical rod protein 1
BRSK1	BR serine/threonine kinase 1
CEP192	centrosomal protein 192
USP33	ubiquitin specific peptidase 33
FNIP1	folliculin interacting protein 1
RASSF5	Ras association domain family member 5
DNAAF4	dynein axonemal assembly factor 4
PIBF1	progesterone immunomodulatory binding factor 1
TOPBP1	DNA topoisomerase II binding protein 1
PIK3R3	phosphoinositide-3-kinase regulatory subunit 3
TSC1	TSC complex subunit 1
NDRG1	N-myc downstream regulated 1
RPGR	retinitis pigmentosa GTPase regulator
COPS5	COP9 signalosome subunit 5
TUBGCP3	tubulin gamma complex associated protein 3
TBC1D31	TBC1 domain family member 31
HOOK2	hook microtubule tethering protein 2
MCRS1	microspherule protein 1
GIMAP5	GTPase, IMAP family member 5
DDX11	DEAD/H-box helicase 11
NEIL1	nei like DNA glycosylase 1
CEP95	centrosomal protein 95
CCDC34	coiled-coil domain containing 34
CDK5RAP3	CDK5 regulatory subunit associated protein 3
NEURL4	neuralized E3 ubiquitin protein ligase 4
RITA1	RBPJ interacting and tubulin associated 1
SCYL1	SCY1 like pseudokinase 1
RPGRIP1	RPGR interacting protein 1
CEP19	centrosomal protein 19
CEP63	centrosomal protein 63
CEP20	centrosomal protein 20
YPEL4	yippee like 4
TSSK2	testis specific serine kinase 2
ALS2	alsin Rho guanine nucleotide exchange factor ALS2
YPEL2	yippee like 2
BBS4	Bardet-Biedl syndrome 4
TUBGCP6	tubulin gamma complex associated protein 6
TUBGCP5	tubulin gamma complex associated protein 5
RANBP9	RAN binding protein 9
CEP89	centrosomal protein 89
HBEGF	heparin binding EGF like growth factor
PSMD1	proteasome 26S subunit, non-ATPase 1
COPS8	COP9 signalosome subunit 8
FEZ1	fasciculation and elongation protein zeta 1
CIB1	calcium and integrin binding 1
FAM110A	family with sequence similarity 110 member A
CCDC77	coiled-coil domain containing 77
TUBGCP2	tubulin gamma complex associated protein 2
HAUS8	HAUS augmin like complex subunit 8
COPS4	COP9 signalosome subunit 4
FSD1	fibronectin type III and SPRY domain containing 1
TBCD	tubulin folding cofactor D
CRB3	crumbs cell polarity complex component 3
CEP250	centrosomal protein 250
DUSP23	dual specificity phosphatase 23
KIAA0586	KIAA0586
HDAC8	histone deacetylase 8
PARD6G	par-6 family cell polarity regulator gamma
CEP41	centrosomal protein 41
UBXN6	UBX domain protein 6
LRRCC1	leucine rich repeat and coiled-coil centrosomal protein 1
CEP295	centrosomal protein 295
CEP44	centrosomal protein 44
SIK2	salt inducible kinase 2
RAB6C	RAB6C, member RAS oncogene family
S1PR5	sphingosine-1-phosphate receptor 5
RGCC	regulator of cell cycle
MOB1A	MOB kinase activator 1A
IPPK	inositol-pentakisphosphate 2-kinase
COPS7B	COP9 signalosome subunit 7B
NEK6	NIMA related kinase 6
PARD6A	par-6 family cell polarity regulator alpha
MKKS	MKKS centrosomal shuttling protein
SPHK2	sphingosine kinase 2
DISC1	DISC1 scaffold protein
LATS2	large tumor suppressor kinase 2
RASSF1	Ras association domain family member 1
TOPORS	TOP1 binding arginine/serine rich protein, E3 ubiquitin ligase
OLA1	Obg like ATPase 1
RNF19A	ring finger protein 19A, RBR E3 ubiquitin protein ligase
TBCCD1	TBCC domain containing 1
HAUS2	HAUS augmin like complex subunit 2
CNTLN	centlein
PPP4R2	protein phosphatase 4 regulatory subunit 2
SPHK1	sphingosine kinase 1
UTP6	UTP6 small subunit processome component
DONSON	DNA replication fork stabilization factor DONSON
PLK2	polo like kinase 2
PKD2L1	polycystin 2 like 1, transient receptor potential cation channel
CEP72	centrosomal protein 72
UXT	ubiquitously expressed prefoldin like chaperone
RPS6KB2	ribosomal protein S6 kinase B2
COPS7A	COP9 signalosome subunit 7A
TUBGCP4	tubulin gamma complex associated protein 4
TUBE1	tubulin epsilon 1
TUBD1	tubulin delta 1
TSKS	testis specific serine kinase substrate
USP21	ubiquitin specific peptidase 21
AKAP11	A-kinase anchoring protein 11
PLAAT4	phospholipase A and acyltransferase 4
PSME2	proteasome activator subunit 2
ODF2L	outer dense fiber of sperm tails 2 like
FZR1	fizzy and cell division cycle 20 related 1
CDC14A	cell division cycle 14A
STX8	syntaxin 8
COPS3	COP9 signalosome subunit 3
CEP131	centrosomal protein 131
BTBD8	BTB domain containing 8
ANKRD26	ankyrin repeat domain 26
CEP164	centrosomal protein 164
RUVBL1	RuvB like AAA ATPase 1
VDAC3	voltage dependent anion channel 3
STK38L	serine/threonine kinase 38 like
NINL	ninein like
AXIN2	axin 2
GIT1	GIT ArfGAP 1
CBY1	chibby family member 1, beta catenin antagonist
RABGAP1	RAB GTPase activating protein 1
KIF3A	kinesin family member 3A
CEP83	centrosomal protein 83
TACC3	transforming acidic coiled-coil containing protein 3
PARP3	poly(ADP-ribose) polymerase family member 3
DYNC1LI1	dynein cytoplasmic 1 light intermediate chain 1
IKBKG	inhibitor of nuclear factor kappa B kinase regulatory subunit gamma
NDC80	NDC80 kinetochore complex component
REC8	REC8 meiotic recombination protein
PARP1	poly(ADP-ribose) polymerase 1
TOP2A	DNA topoisomerase II alpha
CCNB1	cyclin B1
BRAF	B-Raf proto-oncogene, serine/threonine kinase
APC	APC regulator of WNT signaling pathway
PEBP1	phosphatidylethanolamine binding protein 1
TTK	TTK protein kinase
PAFAH1B1	platelet activating factor acetylhydrolase 1b regulatory subunit 1
PSEN1	presenilin 1
PSEN2	presenilin 2
SPINK7	serine peptidase inhibitor Kazal type 7
PTEN	phosphatase and tensin homolog
NUP160	nucleoporin 160
CDC20	cell division cycle 20
ORC2	origin recognition complex subunit 2
HDAC1	histone deacetylase 1
SMC1A	structural maintenance of chromosomes 1A
PPP2R5A	protein phosphatase 2 regulatory subunit B'alpha
SGO1	shugoshin 1
MAPKAPK5	MAPK activated protein kinase 5
SPDL1	spindle apparatus coiled-coil protein 1
AJUBA	ajuba LIM protein
NUP85	nucleoporin 85
NUF2	NUF2 component of NDC80 kinetochore complex
NDEL1	nudE neurodevelopment protein 1 like 1
ANAPC1	anaphase promoting complex subunit 1
SMC3	structural maintenance of chromosomes 3
DYNC1I1	dynein cytoplasmic 1 intermediate chain 1
DAPK3	death associated protein kinase 3
DCTN3	dynactin subunit 3
TUBG1	tubulin gamma 1
MAPK3	mitogen-activated protein kinase 3
NEK2	NIMA related kinase 2
PRKDC	protein kinase, DNA-activated, catalytic subunit
H3-3A	H3.3 histone A
DYNC1I2	dynein cytoplasmic 1 intermediate chain 2
DCTN2	dynactin subunit 2
DCTN1	dynactin subunit 1
DYNC1H1	dynein cytoplasmic 1 heavy chain 1
MAPRE1	microtubule associated protein RP/EB family member 1
LDLRAP1	low density lipoprotein receptor adaptor protein 1
KIF2B	kinesin family member 2B
DYNLRB2	dynein light chain roadblock-type 2
DYNLL2	dynein light chain LC8-type 2
SMURF2	SMAD specific E3 ubiquitin protein ligase 2
DYNLRB1	dynein light chain roadblock-type 1
ANAPC10	anaphase promoting complex subunit 10
MAD1L1	mitotic arrest deficient 1 like 1
BIRC5	baculoviral IAP repeat containing 5
DYNC1LI2	dynein cytoplasmic 1 light intermediate chain 2
PPP1CC	protein phosphatase 1 catalytic subunit gamma
CENPF	centromere protein F
PLK1	polo like kinase 1
PPP1CA	protein phosphatase 1 catalytic subunit alpha
DYNLL1	dynein light chain LC8-type 1
ASPM	assembly factor for spindle microtubules
AURKA	aurora kinase A
CDC27	cell division cycle 27
CDC16	cell division cycle 16
KIF18A	kinesin family member 18A
SPAG5	sperm associated antigen 5
MAD2L1	mitotic arrest deficient 2 like 1
KRIT1	KRIT1 ankyrin repeat containing
KIF3B	kinesin family member 3B
EVI5	ecotropic viral integration site 5
RAB11FIP3	RAB11 family interacting protein 3
TACC1	transforming acidic coiled-coil containing protein 1
SNCG	synuclein gamma
JTB	jumping translocation breakpoint
PRKD3	protein kinase D3
LATS1	large tumor suppressor kinase 1
CHEK2	checkpoint kinase 2
CRYAB	crystallin alpha B
GNAI2	G protein subunit alpha i2
GNAI3	G protein subunit alpha i3
EPB41	erythrocyte membrane protein band 4.1
MAPK1	mitogen-activated protein kinase 1
CTNNB1	catenin beta 1
ARL3	ADP ribosylation factor like GTPase 3
MAP2K2	mitogen-activated protein kinase kinase 2
CAPG	capping actin protein, gelsolin like
PPP1R2	protein phosphatase 1 regulatory inhibitor subunit 2
CTCF	CCCTC-binding factor
GDI2	GDP dissociation inhibitor 2
DNM2	dynamin 2
ANXA11	annexin A11
BRCA2	BRCA2 DNA repair associated
LIMK1	LIM domain kinase 1
LIMK2	LIM domain kinase 2
IST1	IST1 factor associated with ESCRT-III
CALM3	calmodulin 3
GNAI1	G protein subunit alpha i1
MAP2K1	mitogen-activated protein kinase kinase 1
PTPN13	protein tyrosine phosphatase non-receptor type 13
PRKAA1	protein kinase AMP-activated catalytic subunit alpha 1
STK3	serine/threonine kinase 3
ROCK1	Rho associated coiled-coil containing protein kinase 1
SNAPC2	small nuclear RNA activating complex polypeptide 2
CAMK2B	calcium/calmodulin dependent protein kinase II beta
CAMK2G	calcium/calmodulin dependent protein kinase II gamma
CRMP1	collapsin response mediator protein 1
PRKD1	protein kinase D1
SEPTIN7	septin 7
CSPP1	centrosome and spindle pole associated protein 1
PLEKHG6	pleckstrin homology and RhoGEF domain containing G6
CEP55	centrosomal protein 55
EFHC1	EF-hand domain containing 1
ZFYVE26	zinc finger FYVE-type containing 26
MAEA	macrophage erythroblast attacher, E3 ubiquitin ligase
RAB11FIP4	RAB11 family interacting protein 4
SIRT2	sirtuin 2
SEPTIN12	septin 12
MPLKIP	M-phase specific PLK1 interacting protein
NEK7	NIMA related kinase 7
PDCD6IP	programmed cell death 6 interacting protein
WASF1	WASP family member 1
CCDC124	coiled-coil domain containing 124
MAP6	microtubule associated protein 6
CDK5RAP2	CDK5 regulatory subunit associated protein 2
PKP4	plakophilin 4
BARD1	BRCA1 associated RING domain 1
TSG101	tumor susceptibility 101
AKAP9	A-kinase anchoring protein 9
LZTS2	leucine zipper tumor suppressor 2
BBC3	BCL2 binding component 3
CDCA4	cell division cycle associated 4
PRKD2	protein kinase D2
PLK3	polo like kinase 3
SAV1	salvador family WW domain containing protein 1
CENPJ	centromere protein J
RIC8A	RIC8 guanine nucleotide exchange factor A
NDE1	nudE neurodevelopment protein 1
DTL	denticleless E3 ubiquitin protein ligase homolog
SPAST	spastin
AURKC	aurora kinase C
RUVBL2	RuvB like AAA ATPase 2
CHMP3	charged multivesicular body protein 3
CLIC4	chloride intracellular channel 4
MAP4	microtubule associated protein 4
TUBA4A	tubulin alpha 4a
GPSM2	G protein signaling modulator 2
NUMA1	nuclear mitotic apparatus protein 1
KIF14	kinesin family member 14
ARHGEF2	Rho/Rac guanine nucleotide exchange factor 2
MKNK1	MAPK interacting serine/threonine kinase 1
SEPTIN9	septin 9
BRCA1	BRCA1 DNA repair associated
KIF2A	kinesin family member 2A
XPO1	exportin 1
CDK1	cyclin dependent kinase 1
HSP90AA1	heat shock protein 90 alpha family class A member 1
HSPA1B	heat shock protein family A (Hsp70) member 1B
TCP1	t-complex 1
CSNK1A1	casein kinase 1 alpha 1
KIF11	kinesin family member 11
CKAP5	cytoskeleton associated protein 5
CKAP2	cytoskeleton associated protein 2
MARK4	microtubule affinity regulating kinase 4
KATNB1	katanin regulatory subunit B1
KIFC1	kinesin family member C1
KIF15	kinesin family member 15
ZBTB4	zinc finger and BTB domain containing 4
MTUS1	microtubule associated scaffold protein 1
NBN	nibrin
TNKS	tankyrase
H2AX	H2A.X variant histone
TERF1	telomeric repeat binding factor 1
ATM	ATM serine/threonine kinase
TRIOBP	TRIO and F-actin binding protein
CBX5	chromobox 5
DYNLT3	dynein light chain Tctex-type 3
CDC42	cell division cycle 42
TOP2B	DNA topoisomerase II beta
SPC25	SPC25 component of NDC80 kinetochore complex
PLK4	polo like kinase 4
SUMO1	small ubiquitin like modifier 1
CLIP1	CAP-Gly domain containing linker protein 1
AURKB	aurora kinase B
PPP2R1A	protein phosphatase 2 scaffold subunit Aalpha
DLGAP5	DLG associated protein 5
LMNA	lamin A/C
RHOC	ras homolog family member C
VIM	vimentin
USP8	ubiquitin specific peptidase 8
ACTR2	actin related protein 2
RHOA	ras homolog family member A
RACK1	receptor for activated C kinase 1
GOLGA2	golgin A2
PRC1	protein regulator of cytokinesis 1
KIF23	kinesin family member 23
TUBB3	tubulin beta 3 class III
TEKT1	tektin 1
TPX2	TPX2 microtubule nucleation factor
XRCC6	X-ray repair cross complementing 6
XRCC5	X-ray repair cross complementing 5
PTPDC1	protein tyrosine phosphatase domain containing 1
NIN	ninein
CEP57L1	centrosomal protein 57 like 1
CLASP2	cytoplasmic linker associated protein 2
TRIM6	tripartite motif containing 6
GIGYF2	GRB10 interacting GYF protein 2
PPP1R42	protein phosphatase 1 regulatory subunit 42
PPFIA2	PTPRF interacting protein alpha 2
MYO5A	myosin VA
ERC1	ELKS/RAB6-interacting/CAST family member 1
CLASP1	cytoplasmic linker associated protein 1
ST7L	suppression of tumorigenicity 7 like
IQGAP1	IQ motif containing GTPase activating protein 1
SUN3	Sad1 and UNC84 domain containing 3
MTUS2	microtubule associated scaffold protein 2
UBE2C	ubiquitin conjugating enzyme E2 C
PLD2	phospholipase D2
ORC5	origin recognition complex subunit 5
ORC4	origin recognition complex subunit 4
TRMU	tRNA mitochondrial 2-thiouridylase
SERPINI2	serpin family I member 2
CCNB2	cyclin B2
MOS	MOS proto-oncogene, serine/threonine kinase
GNAT1	G protein subunit alpha transducin 1
BGN	biglycan
MCM3	minichromosome maintenance complex component 3
DNAJB1	DnaJ heat shock protein family (Hsp40) member B1
PIK3R1	phosphoinositide-3-kinase regulatory subunit 1
CDC25A	cell division cycle 25A
AKT1	AKT serine/threonine kinase 1
MCM4	minichromosome maintenance complex component 4
MCM7	minichromosome maintenance complex component 7
THPO	thrombopoietin
PRKCI	protein kinase C iota
CASP2	caspase 2
CDC34	cell division cycle 34, ubiqiutin conjugating enzyme
MCM2	minichromosome maintenance complex component 2
GSK3B	glycogen synthase kinase 3 beta
TFAM	transcription factor A, mitochondrial
PRKCZ	protein kinase C zeta
PRKCD	protein kinase C delta
MZT1	mitotic spindle organizing protein 1
TIAM1	TIAM Rac1 associated GEF 1
MAPK7	mitogen-activated protein kinase 7
PPP2R5C	protein phosphatase 2 regulatory subunit B'gamma
CUL1	cullin 1
EIF3A	eukaryotic translation initiation factor 3 subunit A
EIF4A2	eukaryotic translation initiation factor 4A2
MCM6	minichromosome maintenance complex component 6
MELK	maternal embryonic leucine zipper kinase
TSN	translin
TRIP11	thyroid hormone receptor interactor 11
PDCD2	programmed cell death 2
MAPK14	mitogen-activated protein kinase 14
MZT2A	mitotic spindle organizing protein 2A
DARS2	aspartyl-tRNA synthetase 2, mitochondrial
FIGNL1	fidgetin like 1
BRINP3	BMP/retinoic acid inducible neural specific 3
LUZP1	leucine zipper protein 1
HOOK3	hook microtubule tethering protein 3
CDR2L	cerebellar degeneration related protein 2 like
KIF18B	kinesin family member 18B
IFT20	intraflagellar transport 20
CEP120	centrosomal protein 120
STK26	serine/threonine kinase 26
USP32	ubiquitin specific peptidase 32
NEK9	NIMA related kinase 9
IFT81	intraflagellar transport 81
FBXW7	F-box and WD repeat domain containing 7
SLF1	SMC5-SMC6 complex localization factor 1
DCTN5	dynactin subunit 5
TMUB1	transmembrane and ubiquitin like domain containing 1
PACSIN1	protein kinase C and casein kinase substrate in neurons 1
CPEB1	cytoplasmic polyadenylation element binding protein 1
CRNKL1	crooked neck pre-mRNA splicing factor 1
CAB39L	calcium binding protein 39 like
FANCE	FA complementation group E
MYO10	myosin X
SAR1A	secretion associated Ras related GTPase 1A
TUBG2	tubulin gamma 2
DIAPH3	diaphanous related formin 3
PKD2L2	polycystin 2 like 2, transient receptor potential cation channel
ARHGEF12	Rho guanine nucleotide exchange factor 12
IFT80	intraflagellar transport 80
ORC3	origin recognition complex subunit 3
TEKT2	tektin 2
PACSIN3	protein kinase C and casein kinase substrate in neurons 3
PACSIN2	protein kinase C and casein kinase substrate in neurons 2
PROCR	protein C receptor
SSX2IP	SSX family member 2 interacting protein
MTO1	mitochondrial tRNA translation optimization 1
MOB4	MOB family member 4, phocein
CDKN2C	cyclin dependent kinase inhibitor 2C
GADD45A	growth arrest and DNA damage inducible alpha
PRKACB	protein kinase cAMP-activated catalytic subunit beta
E2F2	E2F transcription factor 2
RPS27	ribosomal protein S27
TNKS2	tankyrase 2
NPM3	nucleophosmin/nucleoplasmin 3
LTO1	LTO1 maturation factor of ABCE1
CCND1	cyclin D1
NPAT	nuclear protein, coactivator of histone transcription
C11orf65	chromosome 11 open reading frame 65
CCND2	cyclin D2
PSMD9	proteasome 26S subunit, non-ATPase 9
CDK4	cyclin dependent kinase 4
XRCC3	X-ray repair cross complementing 3
PAK6	p21 (RAC1) activated kinase 6
RAD51	RAD51 recombinase
PPP1R14D	protein phosphatase 1 regulatory inhibitor subunit 14D
KPNA2	karyopherin subunit alpha 2
TYMS	thymidylate synthetase
TYMSOS	TYMS opposite strand RNA
CCNE1	cyclin E1
PRKACA	protein kinase cAMP-activated catalytic subunit alpha
SLC35F6	solute carrier family 35 member F6
CENPA	centromere protein A
CSNK2A3	casein kinase 2 alpha 3
E2F1	E2F transcription factor 1
ATR	ATR serine/threonine kinase
EXOSC9	exosome component 9
CENPE	centromere protein E
SKP2	S-phase kinase associated protein 2
CENPH	centromere protein H
FAM53C	family with sequence similarity 53 member C
E2F3	E2F transcription factor 3
PPP2R5D	protein phosphatase 2 regulatory subunit B'delta
CCND3	cyclin D3
MEA1	male-enhanced antigen 1
CDK6	cyclin dependent kinase 6
EFCAB10	EF-hand calcium binding domain 10
CDK5	cyclin dependent kinase 5
XRCC2	X-ray repair cross complementing 2
CDKN2A	cyclin dependent kinase inhibitor 2A
PRKACG	protein kinase cAMP-activated catalytic subunit gamma
SSAS6	SAS-6 centriolar assembly protein
CCDC39	coiled-coil domain containing 39
CCDC40	coiled-coil domain containing 39
KITLG	KIT ligand
FBXW5	F-box and WD repeat domain containing 5
TUBA1B	tubulin alpha 1b
TUBA1A	tubulin alpha 1a
TUBB4A	tubulin beta 4A class Iva
SCLT1	sodium channel and clathrin linker 1
MDM1	Mdm1 nuclear protein
LRRC45	leucine rich repeat containing 45
HAUS5	HAUS augmin like complex subunit 5
MYH14	myosin heavy chain 14
HAUS3	HAUS augmin like complex subunit 3
CCDC15	coiled-coil domain containing 15
CEP128	centrosomal protein 128
NME7	NME/NM23 family member 7
CEP97	centrosomal protein 97
CEP78	centrosomal protein 78
CFAP53	cilia and flagella associated protein 53
DNAH3	dynein axonemal heavy chain 3
DNAH7	dynein axonemal heavy chain 7
IFT74	intraflagellar transport 74
SEPITN7	septin 7
TTBK2	tau tubulin kinase 2
CEP85	centrosomal protein 85
IFFO2	Intermediate filament family orphan 2; Belongs to the intermediate filament family (517 aa)
